# Supplementary material for: Myelinating Schwann cells and Netrin-1 control intra-nervous vascularization of the developing mouse sciatic nerve
Source: eLife. 2022 Jan 12;11:e64773. doi: 10.7554/eLife.64773 (PMC8782568; doi:10.7554/eLife.64773)
Supplement: Figure 1—source data 1. [file elife-64773-fig1-data1.xlsx]

## Sheet: Sheet1
E19	P0	P2	P5
27.0838	9.12998	1.68352	2.93082
23.2083	12.3995	2.77961	3.59214
22.7254	10.0938	1.21859	3.87642
	11.7768	2.57274	3.05305
	13.5312
