# Supplementary material for: Myelinating Schwann cells and Netrin-1 control intra-nervous vascularization of the developing mouse sciatic nerve
Source: eLife. 2022 Jan 12;11:e64773. doi: 10.7554/eLife.64773 (PMC8782568; doi:10.7554/eLife.64773)
Supplement: Figure 2—source data 1. [file elife-64773-fig2-data1.xlsx]

## Sheet: CX40 GFP + cells
P0	P5
0.177653	0.102504
0.261872	0.0954638
0.458104	0.156478
	0.0938855

## Sheet: NG2-Dsred + coverage
P0	P5	P10
0.298925	0.288408	0.707731
0.269107	0.258862	0.627935
0.226188	0.348357	0.570038
0.399616	0.255642
