# Supplementary material for: Myelinating Schwann cells and Netrin-1 control intra-nervous vascularization of the developing mouse sciatic nerve
Source: eLife. 2022 Jan 12;11:e64773. doi: 10.7554/eLife.64773 (PMC8782568; doi:10.7554/eLife.64773)
Supplement: Figure 3—source data 1. [file elife-64773-fig3-data1.xlsx]

## Sheet: Figure 3 - source data 1
P0	P2	P5	P10	P15	Young adult
24370.4	39135	67398.3	106621	88619	242540
23068.3	21578.3	54698.9	130146	148236	182298
15109.6	59606.4	66170.5	142320	104833	173224
11530.5	60616.6	58936.9
20849.3
