# Supplementary material for: Myelinating Schwann cells and Netrin-1 control intra-nervous vascularization of the developing mouse sciatic nerve
Source: eLife. 2022 Jan 12;11:e64773. doi: 10.7554/eLife.64773 (PMC8782568; doi:10.7554/eLife.64773)
Supplement: Figure 4—figure supplement 1—source data 1. [file elife-64773-fig4-figsupp1-data1.xlsx]

## Sheet: % sox10+ area
Wnt1-Cre	Wnt1cre ; Krox20GFP(DT)/+
47.1867	6.5815
39.9535	16.875
63.712	3.815

## Sheet: nerve size
Wnt1-Cre	Wnt1cre ; Krox20GFP(DT)/+
739581	186251
554321	109966
365804	341725
