# Supplementary material for: Myelinating Schwann cells and Netrin-1 control intra-nervous vascularization of the developing mouse sciatic nerve
Source: eLife. 2022 Jan 12;11:e64773. doi: 10.7554/eLife.64773 (PMC8782568; doi:10.7554/eLife.64773)
Supplement: Figure 4—figure supplement 2—source data 1. [file elife-64773-fig4-figsupp2-data1.xlsx]

## Sheet: nerve area (um2)
Wnt1-Cre	Wnt1cre ; Krox20GFP(DT)/+
184392	155487
167147	117206
145567	158083
226961	171988
	148024

## Sheet: % area CD31" Wnt1-Cre"_x0009_"Wnt1cre
Wnt1-Cre	Wnt1cre ; Krox20GFP(DT)/+
20.56	36
24.418	30
21.332	38
28.304	34.012
	39
