# Supplementary material for: Myelinating Schwann cells and Netrin-1 control intra-nervous vascularization of the developing mouse sciatic nerve
Source: eLife. 2022 Jan 12;11:e64773. doi: 10.7554/eLife.64773 (PMC8782568; doi:10.7554/eLife.64773)
Supplement: Figure 4—source data 1. [file elife-64773-fig4-data1.xlsx]

## Sheet: nerve area (um2)
Wnt1-Cre	Wnt1cre ; Krox20GFP(DT)/+
241696	96873.6
345912	76521.8
583195	74478.6
528561	84475
	69229.8

## Sheet: BV length over nerve area
Wnt1-Cre	Wnt1cre ; Krox20GFP(DT)/+
0.0539998	0.107074
0.0420422	0.098208
0.0350299	0.0859567
0.0364889	0.0547341
	0.0469224

## Sheet: nb of branch points per 1 mm BV
Wnt1-Cre	Wnt1cre ; Krox20GFP(DT)/+
28.196	41.5514
24.2042	58.5492
25.7963	39.3631
26.9099	52.5558
	32.939

## Sheet: branch points over BV length 
Wnt1-Cre	Wnt1cre ; Krox20GFP(DT)/+
0.028196	0.0415514
0.0242042	0.0585492
0.0257963	0.0393631
0.0269099	0.0525558
	0.032939

## Sheet: branch points over nerve area
Wnt1-Cre	Wnt1cre ; Krox20GFP(DT)/+
0.00152258	0.0044491
0.0010176	0.00575
0.000903642	0.00338352
0.00098191	0.00287659
	0.00154558
