# Supplementary material for: Myelinating Schwann cells and Netrin-1 control intra-nervous vascularization of the developing mouse sciatic nerve
Source: eLife. 2022 Jan 12;11:e64773. doi: 10.7554/eLife.64773 (PMC8782568; doi:10.7554/eLife.64773)
Supplement: Figure 5—source data 1. [file elife-64773-fig5-data1.xlsx]

## Sheet: nerve area (um2)Krox20Cre +_x0009_Kro
Krox20Cre/+	Krox20Cre/Fl
857444	617994
891175	467347
401410	605640
882816	676297
910009	683627

## Sheet: nb of branch points per 1 mm BV
Krox20Cre/+	Krox20Cre/Fl
8.74006	14.8443
5.41327	27.0162
6.39108	22.22
8.74521	15.2458
9.95856	14.9719

## Sheet: BV length over nerve area
Krox20Cre/+	Krox20Cre/Fl
0.0392308	0.071836
0.0412506	0.0837167
0.0459959	0.0770583
0.0452049	0.082636

## Sheet: branch points over BV length
Krox20Cre/+	Krox20Cre/Fl
0.00874006	0.0148443
0.00541327	0.0270162
0.00639108	0.0222201
0.00874521	0.0152458
0.00995856	0.0149719

## Sheet: branch points over nerve area
Krox20Cre/+	Krox20Cre/Fl
0.00034288	0.00106635
0.000223301	0.0022617
0.000293964	0.00171224
0.00039306	0.00126143
0.000451644	0.00116022

## Sheet: number of Ki67+ cells
Krox20Cre/+	Krox20Cre/Fl
34.4615	302.8
33.5455	452.375
39.7	707
15.9412	747
