# Supplementary material for: Myelinating Schwann cells and Netrin-1 control intra-nervous vascularization of the developing mouse sciatic nerve
Source: eLife. 2022 Jan 12;11:e64773. doi: 10.7554/eLife.64773 (PMC8782568; doi:10.7554/eLife.64773)
Supplement: Figure 6—figure supplement 1—source data 1. [file elife-64773-fig6-figsupp1-data1.xlsx]

## Sheet: average nerve diameter
Ntn1+/+	Ntn1LacZ/LacZ
106.493	145.154
110.072	125.037
98.2723	106.901
88.6295	112.035
104.716	91.2283

## Sheet: FISH unc5b
Number of unc5b dots/mm2
nerve area without blood vessels	blood vessels area
96632.4	827203
119863	1.05376e+06
71646.1	1.21841e+06
178044	1.64918e+06

## Sheet: FISH ntn1
number of Ntn1 dots/mm2
Epinerve	Endonerve
230409	45507.3
561410	42017.5
451899	33781.1
329852	34517.3
376665	35065.2

## Sheet: UNC5B 
% UNC5B+ (blood vessels area)
36.6703
30.042
32.4005

## Sheet: Netrin1
B-gal+/FAP+ ratio
0.634212
0.621442
0.639831
