# Supplementary material for: Myelinating Schwann cells and Netrin-1 control intra-nervous vascularization of the developing mouse sciatic nerve
Source: eLife. 2022 Jan 12;11:e64773. doi: 10.7554/eLife.64773 (PMC8782568; doi:10.7554/eLife.64773)
Supplement: Figure 6—source data 1. [file elife-64773-fig6-data1.xlsx]

## Sheet: (D) dissected SN nerve area
Ntn1+/+	Ntn1LacZ/LacZ
89390	53403.9
75376.9	60915.7
64613.1	59234.8
55002.7	94815.7
58982.1	83776.9
68294.1	54795.3

## Sheet: (E ) dissected SN CD31 area
Ntn1+/+	Ntn1LacZ/LacZ
16.683	11.874
20.647	10.983
22.735	22.1
21.577	20.116
26.717	7.858
25.455	18.578
12.787
22.896
18.501
25.36
32.018

## Sheet: (H) cleared paw nerve area
Ntn1+/+	Ntn1LacZ/LacZ
640533	508623
525375	551442
368694	393962
660030

## Sheet: (I) cleared paw CD31 area
Ntn1+/+	Ntn1LacZ/LacZ
38.612	27.858
31.152	29.302
32.818	26.228
36.563	31
43.891

## Sheet: (J) receptors expression 
cd31	neo1	unc5b	dcc
0.0563715	0.00787289	0.0180871	0.00017157
0.0714802	0.00701028	0.00971	0.00241073
0.0797657	0.0193961	0.0193961	0
0.0199894	0.003633	0.0244398	0
0.0793834	0.00673074	0.0367779	0
samples	gapdh	Beta-actine	ref	CD31	fold	Neo1	fold	Unc5b	fold	dcc	fold
P2-1	24.73	23.1	23.9011	28.05	0.0563715	30.89	0.00787289	29.69	0.0180871	36.41	0.000171573
P2-2	23.1	22.61	22.8537	26.66	0.0714802	30.01	0.00701028	29.54	0.00971	31.55	0.00241073
P2-3	20.69	18.59	19.6119	23.26	0.0797657	25.3	0.0193961	25.3	0.0193961	0	0
P2-4	22.69	21.09	21.8754	27.52	0.0199894	29.98	0.003633	27.23	0.0244398	0	0
P2-5	23.39	21.08	22.205	25.86	0.0793834	29.42	0.00673074	26.97	0.0367779	0	0

## Sheet: (M) CD31 area
Vehicle	Unc5b blocked
35.122	32.27
34.689	33.245
38.2565	29.041
37.898	27.7795
36.141	33.7655
38.2295	38.479
36.2355	30.7105
39.95	27.6045
45.017	30.388
36.337	24.435
	34.01
	34.2655
